# Supplementary material for: The Extreme Variety of Genotoxic Response to Benzo[a]pyrene in Three Different Human Cell Lines from Three Different Organs
Source: PubMed Central journal article supplement (PMC3832631; doi:10.1371/journal.pone.0078356), 2013-11-08
Supplement: pone.0078356.s001.pdf [file pone.0078356.s001.pdf]

**Table S1:** primers used for qPCR experiments

| Gene   | Forward primer        | Reverse primer        | Product Size (pb) |
|--------|-----------------------|-----------------------|-------------------|
| GAPDH  | GAGTCAACGGATTTGGTCGT  | TTGATTTTGGAGGGATCTCG  | 238               |
| S18    | AACGTCTGCCCTATCAACTTT | TGGATGTGGTAGCCGTTTTCT | 117               |
| CYP1A1 | CTTGGACCTCTTTGGAGCTG  | CGAAGGAAGAGTGTCGGAAG  | 212               |
| CYP1B1 | GACCCCCAGTCTCAATCTCA  | CTCCCACTCGAGTCTCTTGG  | 152               |
| CYP1A2 | GGACAGCACTTCCCTGAGAG  | GTCCCGGACACTGTTCTTGT  | 231               |
| CYP3A4 | GCCTACAGCATGGATGTGAT  | CGAGGCGACTTTCTTTCATC  | 250               |
| EPH    | CAGAGGCATCCTCCAAGAAG  | GCAGGAGGGTCAGGGTAGAG  | 219               |
| GSTA1  | CGGTGACAGCGTTTAACAAA  | GCACTTGCTGGAACATCAAA  | 247               |
| GSTP1  | ACCTCCGCTGCAAATACATC  | GGCTAGGACCTCATGGATCA  | 206               |
| AKRC1  | AGATTGCAGATGGCAGTGTG  | TCACCTTCTCACCTGGCTTT  | 183               |
| MRP4   | GTTGCAAGGGTTCTGGGATA  | GCTGTGTTCAAAGCCACAGA  | 225               |
