# Supplementary material for: The Extreme Variety of Genotoxic Response to Benzo[a]pyrene in Three Different Human Cell Lines from Three Different Organs
Source: PubMed Central journal article supplement (PMC3832631; doi:10.1371/journal.pone.0078356), 2013-11-08
Supplement: pone.0078356.s002.pdf [file pone.0078356.s002.pdf]

**Table S2:** time-dependent modulation of GST expression in A549 and HepG2 cells exposed to 0.2  $\mu$ M B[a]P.

|                   | HepG2           |                   | A549            |                   |
|-------------------|-----------------|-------------------|-----------------|-------------------|
| Exposure time (h) | GSTA1           | GSTP1             | GSTA1           | GSTP1             |
| 0.5               | 1.21 $\pm$ 0.07 | 0.58 $\pm$ 0.13   | 1.06 $\pm$ 0.45 | 1.09 $\pm$ 0.50   |
| 1                 | 1.27 $\pm$ 0.01 | 0.68 $\pm$ 0.54   | 0.86 $\pm$ 0.22 | 1.05 $\pm$ 0.44   |
| 2                 | 1.28 $\pm$ 0.02 | 2.99 $\pm$ 0.95 * | 0.75 $\pm$ 0.25 | 1.21 $\pm$ 0.44   |
| 4                 | 1.41 $\pm$ 0.12 | 0.92 $\pm$ 0.07   | 0.98 $\pm$ 0.32 | 0.33 $\pm$ 0.16 * |
| 6                 | 1.27 $\pm$ 0.01 | 2.30 $\pm$ 0.65   | 1.21 $\pm$ 0.19 | 0.54 $\pm$ 0.33   |
| 14                | 1.26 $\pm$ 0.14 | 0.66 $\pm$ 0.34   | 0.70 $\pm$ 0.23 | 0.60 $\pm$ 0.26   |
| 24                | 1.38 $\pm$ 0.02 | 0.55 $\pm$ 0.06   | 1.32 $\pm$ 0.52 | 0.66 $\pm$ 0.31   |
